# Supplementary material for: Lack of associations between LIG3 gene polymorphisms and neuroblastoma susceptibility in Chinese children
Source: PubMed Central journal article supplement (PMC6843871; doi:10.7150/jca.33605), 2019-10-03
Supplement: jcav10p5722s1.pdf [file jcav10p5722s1.pdf]

**Supplemental Table 1.** Frequency distribution of selected characteristics in cases and controls

| Variables              | Combined subjects |       |                     |       | <i>P</i> <sup>a</sup> | Shaanxi province |       |                     |       | <i>P</i> <sup>a</sup> |
|------------------------|-------------------|-------|---------------------|-------|-----------------------|------------------|-------|---------------------|-------|-----------------------|
|                        | Cases<br>(n=469)  |       | Controls<br>(n=998) |       |                       | Cases<br>(n=76)  |       | Controls<br>(n=186) |       |                       |
|                        | No.               | %     | No.                 | %     |                       | No.              | %     | No.                 | %     |                       |
| Age range, month       | 0.00-132.00       |       | 0.03-156.00         |       | 0.263                 | 0.07-89.00       |       | 0.03-60.00          |       | 0.110                 |
| Mean ± SD              | 34.07±27.60       |       | 32.89±27.43         |       |                       | 24.48±25.23      |       | 23.66±16.66         |       |                       |
| ≤18                    | 169               | 36.03 | 390                 | 39.08 |                       | 43               | 56.58 | 85                  | 45.70 |                       |
| >18                    | 300               | 63.97 | 608                 | 60.92 |                       | 33               | 43.42 | 101                 | 54.30 |                       |
| Gender                 |                   |       |                     |       | 0.911                 |                  |       |                     |       | 0.778                 |
| Female                 | 196               | 41.79 | 414                 | 41.48 |                       | 28               | 36.84 | 72                  | 38.71 |                       |
| Male                   | 273               | 58.21 | 584                 | 58.52 |                       | 48               | 63.16 | 114                 | 61.29 |                       |
| INSS stages            |                   |       |                     |       |                       |                  |       |                     |       |                       |
| I                      | 133               | 28.42 | /                   | /     |                       | 64               | 84.21 | /                   | /     |                       |
| II                     | 100               | 21.37 | /                   | /     |                       | 7                | 9.21  | /                   | /     |                       |
| III                    | 69                | 14.74 | /                   | /     |                       | 1                | 1.32  | /                   | /     |                       |
| IV                     | 147               | 31.41 | /                   | /     |                       | 4                | 5.26  | /                   | /     |                       |
| 4s                     | 11                | 2.35  | /                   | /     |                       | /                | /     | /                   | /     |                       |
| NA                     | 8                 | 1.71  | /                   | /     |                       | /                | /     | /                   | /     |                       |
| Sites of origin        |                   |       |                     |       |                       |                  |       |                     |       |                       |
| Adrenal gland          | 162               | 34.54 | /                   | /     |                       | 9                | 11.84 | /                   | /     |                       |
| Retroperitoneal region | 138               | 29.42 | /                   | /     |                       | 51               | 67.11 | /                   | /     |                       |
| Mediastinum            | 121               | 25.80 | /                   | /     |                       | 12               | 15.79 | /                   | /     |                       |
| Other region           | 40                | 8.53  | /                   | /     |                       | 4                | 5.26  | /                   | /     |                       |
| NA                     | 8                 | 1.71  | /                   | /     |                       | /                | /     | /                   | /     |                       |

SD, standard deviation; NA, not available.

<sup>a</sup> Two-sided  $\chi^2$  test for distributions between neuroblastoma cases and cancer-free controls.
